# Supplementary material for: Suppression of capsule expression in Δlon strains of Escherichia coli by two novel rpoB mutations in concert with HNS: possible role for DNA bending at rcsA promoter
Source: PubMed Central journal article supplement (PMC4618605; doi:10.1002/mbo3.268), 2015-09-25

**Table S1:**

| <b>Experiment No.</b> | <b>No. of Rif<sup>R</sup> colonies obtained in LB+Rif Agar Plates</b> | <b>No. of Lac<sup>-</sup> colonies among Rif<sup>R</sup> mutants</b> | <b>No. of MMS<sup>R</sup> colonies among Rif<sup>R</sup> mutants*</b> |
|-----------------------|-----------------------------------------------------------------------|----------------------------------------------------------------------|-----------------------------------------------------------------------|
| 1.                    | 40                                                                    | 1                                                                    | 1                                                                     |
| 2.                    | 18                                                                    | 0                                                                    | 0                                                                     |
| 3.                    | 84                                                                    | 1                                                                    | 0                                                                     |
| 4.                    | 63                                                                    | 0                                                                    | 0                                                                     |
| 5.                    | 70                                                                    | 2                                                                    | 0                                                                     |
| 6.                    | 10                                                                    | 1                                                                    | 0                                                                     |
| 7.                    | 17                                                                    | 2                                                                    | 0                                                                     |
| 8.                    | 11                                                                    | 1                                                                    | 0                                                                     |
| 9.                    | 21                                                                    | 0                                                                    | 0                                                                     |
| 10.                   | 33                                                                    | 3                                                                    | 0                                                                     |
|                       | Total                                                                 | 11/367                                                               | 1/367                                                                 |

\* Since genetic analyses revealed that in the only one Rif<sup>R</sup> MMS<sup>R</sup> isolate obtained, the *rif* mutation does not play any role in eliciting the MMS<sup>R</sup> phenotype, this aspect was not studied further (see text for more details).

**Table S2:**

| Donor       | Recipient* | Selected Marker          | Percentage Distribution of<br>(unselected phenotype) Cps::Lac <sup>+/-</sup><br>Rif <sup>R/S</sup> phenotype |                                      |                                      |                                      |
|-------------|------------|--------------------------|--------------------------------------------------------------------------------------------------------------|--------------------------------------|--------------------------------------|--------------------------------------|
|             |            |                          | Rif <sup>R</sup><br>Lac <sup>+</sup>                                                                         | Rif <sup>R</sup><br>Lac <sup>-</sup> | Rif <sup>S</sup><br>Lac <sup>+</sup> | Rif <sup>S</sup><br>Lac <sup>-</sup> |
| P1/CAG18618 | #1         | <i>thiC3178::Tn10kan</i> | 0<br>(0/88)                                                                                                  | 20<br>(18/88)                        | 80<br>(70/88)                        | 0<br>(0/88)                          |
| P1/CAG18618 | #2         | <i>thiC3178::Tn10kan</i> | 0<br>(0/48)                                                                                                  | 17<br>(08/48)                        | 83<br>(40/48)                        | 0<br>(0/48)                          |
| P1/CAG18618 | #5         | <i>thiC3178::Tn10kan</i> | 0<br>(0/85)                                                                                                  | 18<br>(15/85)                        | 82<br>(70/85)                        | 0<br>(0/85)                          |
| P1/CAG18618 | #6         | <i>thiC3178::Tn10kan</i> | 0<br>(0/86)                                                                                                  | 29<br>(25/86)                        | 71<br>(61/86)                        | 0<br>(0/86)                          |
| P1/CAG18618 | #21        | <i>thiC3178::Tn10kan</i> | 0<br>(0/56)                                                                                                  | 11<br>(06/56)                        | 89<br>(50/56)                        | 0<br>(0/56)                          |
| P1/CAG18618 | #22        | <i>thiC3178::Tn10kan</i> | 0<br>(0/52)                                                                                                  | 23<br>(12/52)                        | 77<br>(40/52)                        | 0<br>(0/52)                          |
| P1/CAG18618 | #23        | <i>thiC3178::Tn10kan</i> | 0<br>(0/87)                                                                                                  | 21<br>(18/87)                        | 79<br>(69/87)                        | 0<br>(0/87)                          |
| P1/CAG18618 | #24        | <i>thiC3178::Tn10kan</i> | 0<br>(0/56)                                                                                                  | 27<br>(15/56)                        | 73<br>(41/56)                        | 0<br>(0/56)                          |

|             |      |                          |             |               |               |             |
|-------------|------|--------------------------|-------------|---------------|---------------|-------------|
| P1/CAG18618 | #25  | <i>thiC3178::Tn10kan</i> | 0<br>(0/65) | 18<br>(12/65) | 82<br>(53/65) | 0<br>(0/65) |
| P1/CAG18618 | #26  | <i>thiC3178::Tn10kan</i> | 0<br>(0/75) | 29<br>(22/75) | 71<br>(53/75) | 0<br>(0/75) |
| P1/CAG18618 | #210 | <i>thiC3178::Tn10kan</i> | 0<br>(0/52) | 17<br>(09/52) | 83<br>(43/52) | 0<br>(0/52) |

\* Denotes the Rif<sup>R</sup> isolates of SG20780 (*Alon cps::lac*)

**Figure S1**

**(A)**

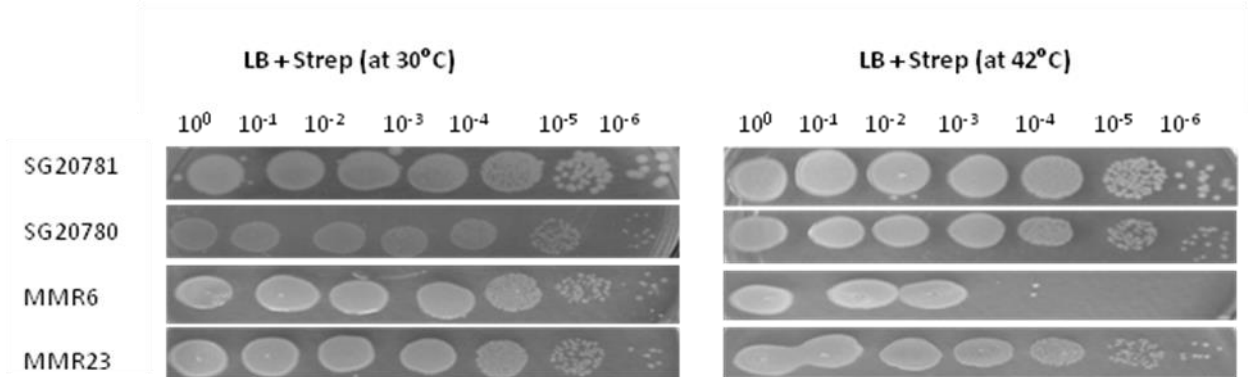

**(B)**

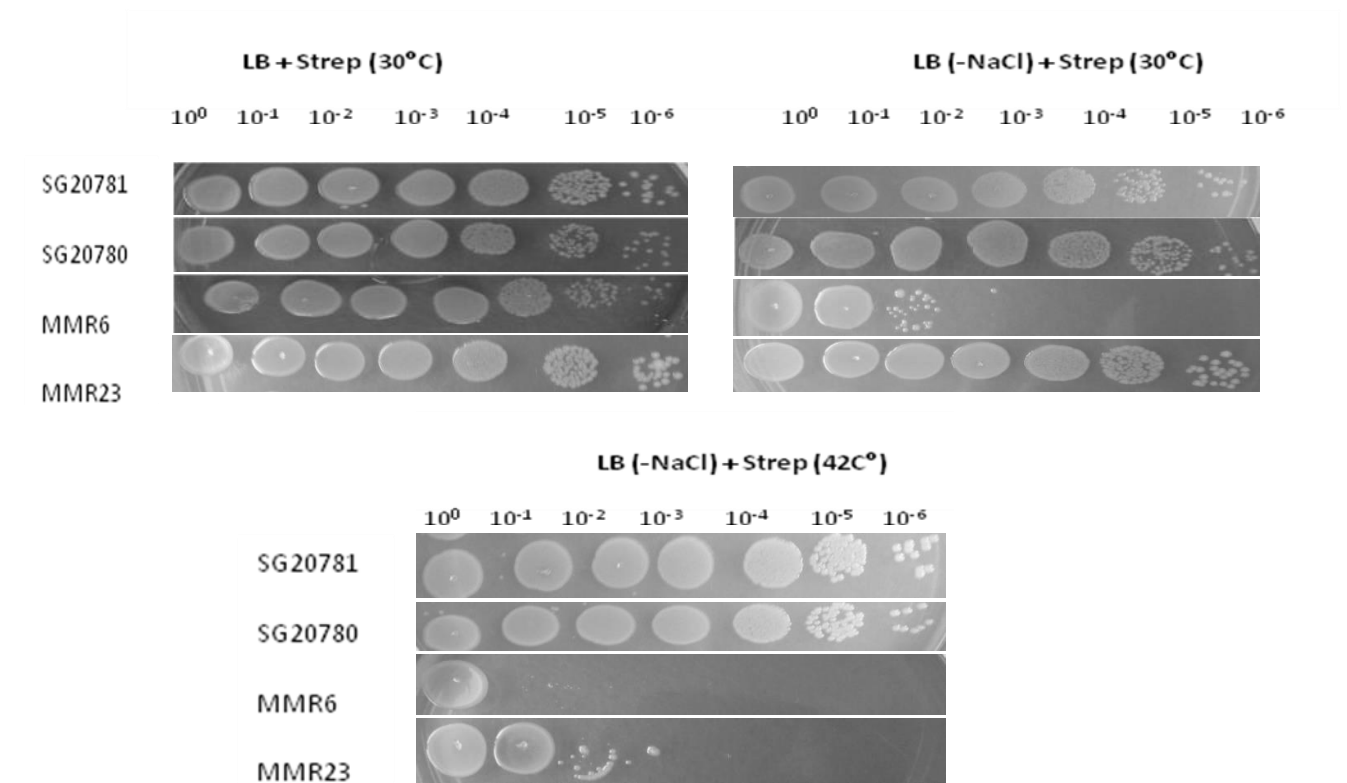

(C)

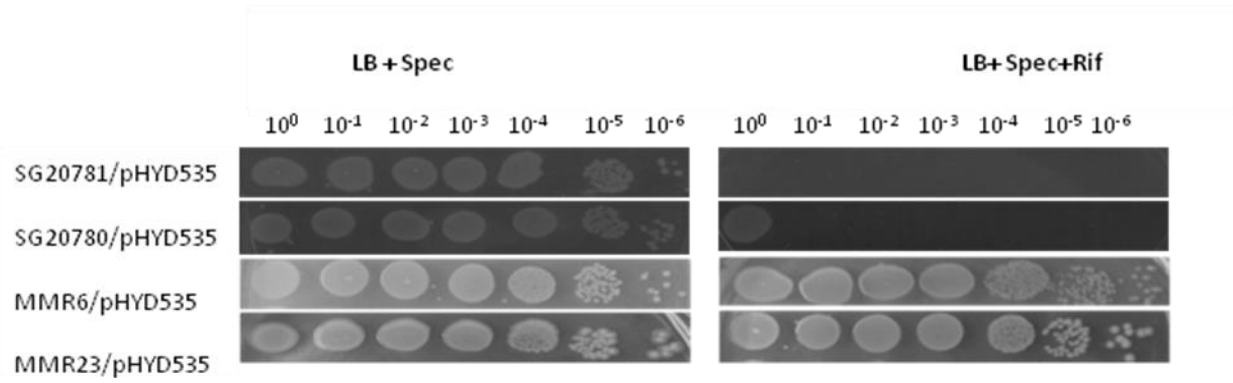

Supplement: mbo30004-0712-sd3.pdf [file mbo30004-0712-sd3.pdf]
